# Supplementary material for: An ultraviolet, self-powered, and large area photodetector based on a n-SnO2/p-spiro-OMeTAD organic–inorganic heterojunction
Source: Royal Society of Chemistry journal article supplement (doi:10.1039/d3tc03474g), 2023-11-22
Supplement: d3tc03474g1.pdf [file d3tc03474g1.pdf]

## Electronic Supplementary

### Information(ESI)

**Title: Ultraviolet, self-powered, and large area photodetector based on n-SnO<sub>2</sub>/p-Spiro-OMeTAD organic-inorganic heterojunction**

Mengqing Li,<sup>a</sup> Huawei Zhou,<sup>a,\*</sup> Jie Yin,<sup>a,\*</sup> and Xianxi Zhang<sup>a,\*</sup>

<sup>a</sup> *School of Chemistry and Chemical Engineering. College of Materials Science and Engineering. Shandong Provincial Key Laboratory/Collaborative Innovation Center of Chemical Energy Storage. Liaocheng University.*

\*E-mail: zhouhuaweiopv@163.com. xxzhang3@126.com

## Supplementary Figures

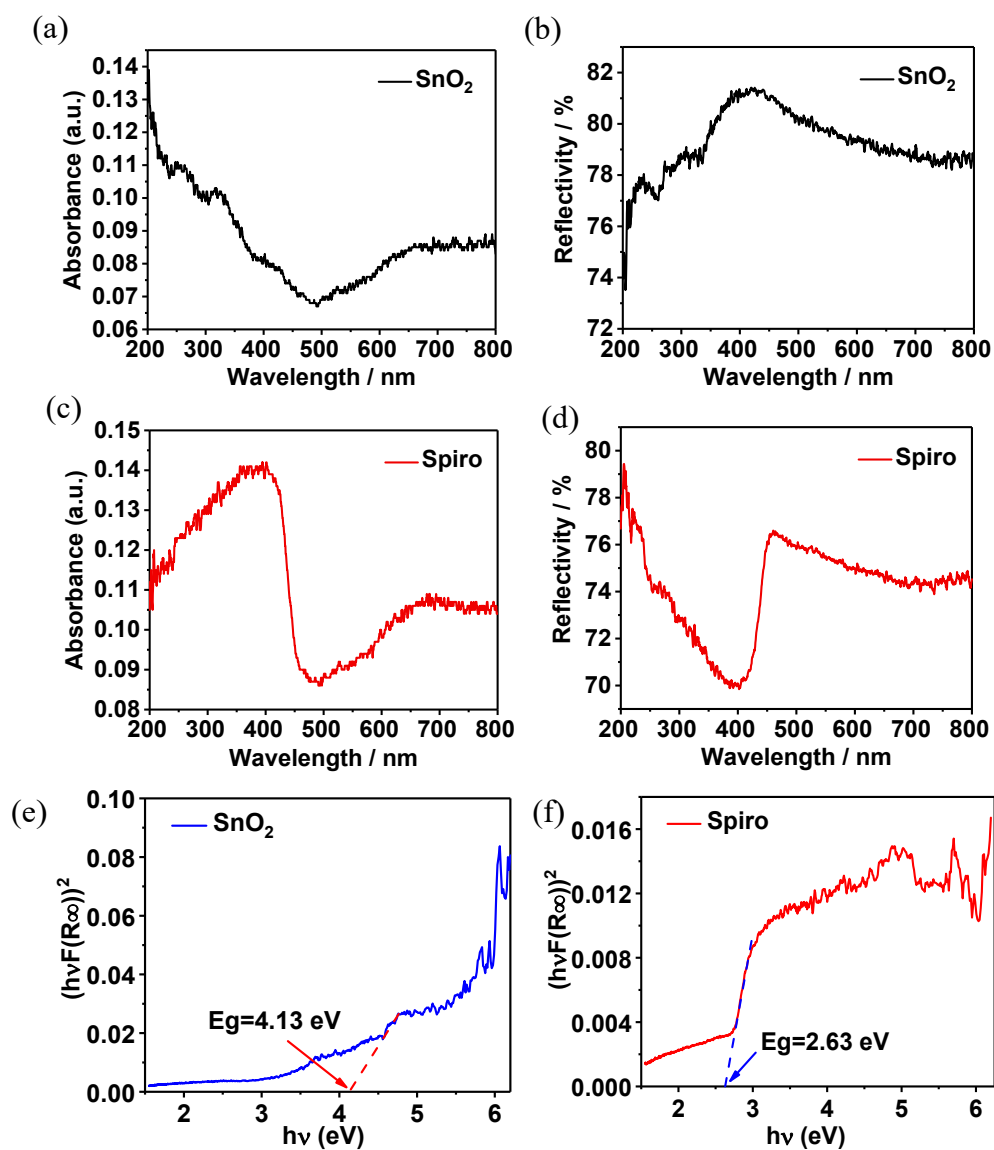

Fig. S1 Ultraviolet-visible absorption (a) and reflection spectra (b) of SnO<sub>2</sub>-P. Ultraviolet-visible absorption (c) and reflection spectra (d) of Spiro-OMeTAD-P.  $h\nu-(h\nu F(R_{\infty}))^{1/2}$  curve of SnO<sub>2</sub>-P (e) and Spiro-OMeTAD-P (f).

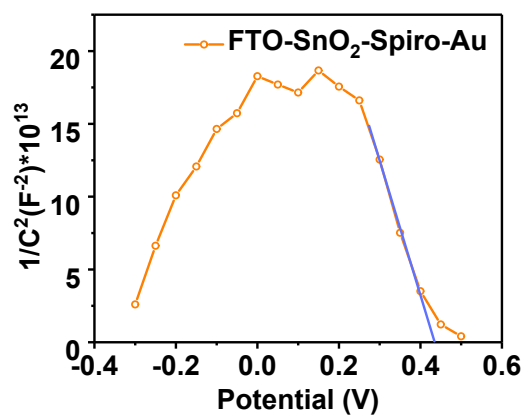

Fig. S2 Mott-Schottky curves of FTO/SnO<sub>2</sub>/Spiro-OMeTAD/Au devices.

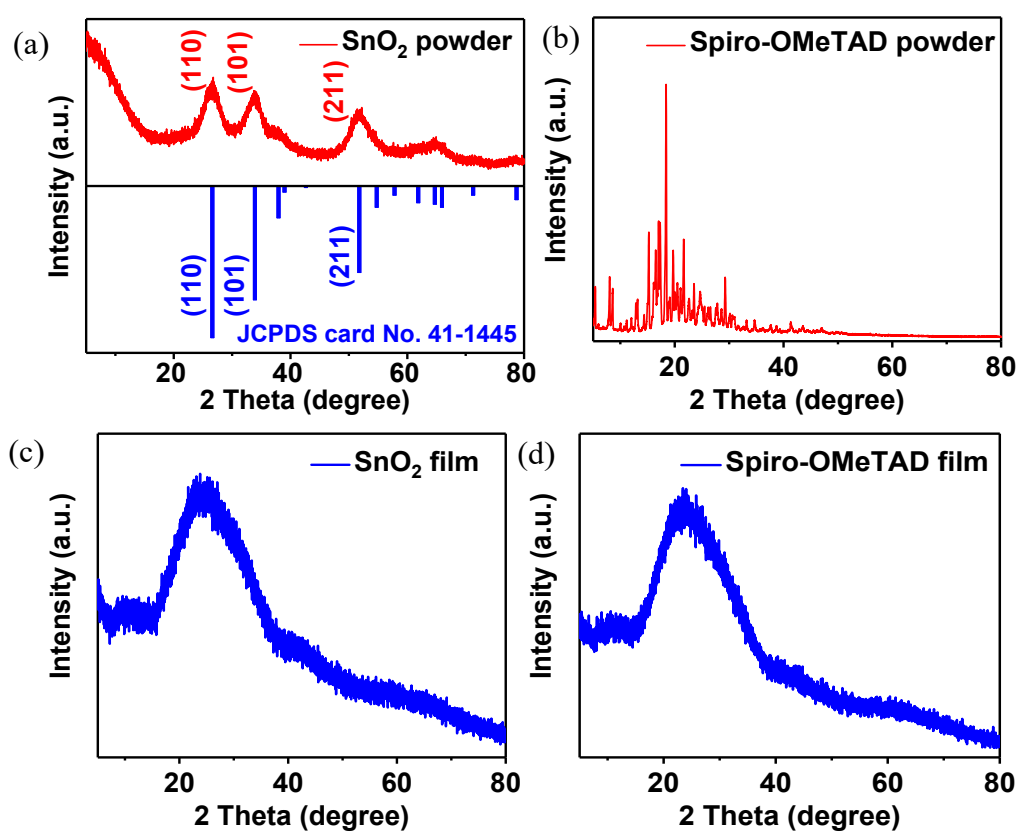

Fig. S3 (a) XRD pattern of SnO<sub>2</sub> powder; (b) XRD pattern of Spiro-OMeTAD powder; (c) XRD pattern of SnO<sub>2</sub> film; (d) XRD pattern of Spiro-OMeTAD film.

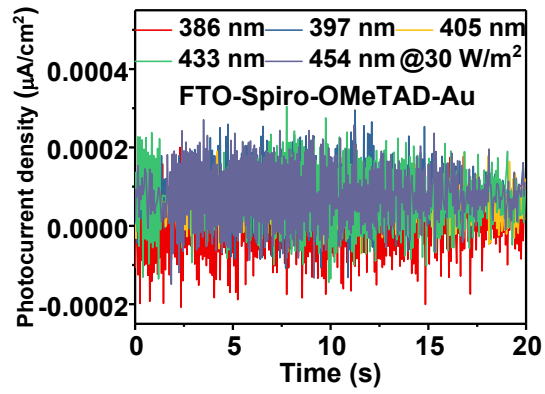

Fig. S4 J-t curves of FTO/Spiro-OMeTAD/Au at different wavelengths with 30 W/m<sup>2</sup>.

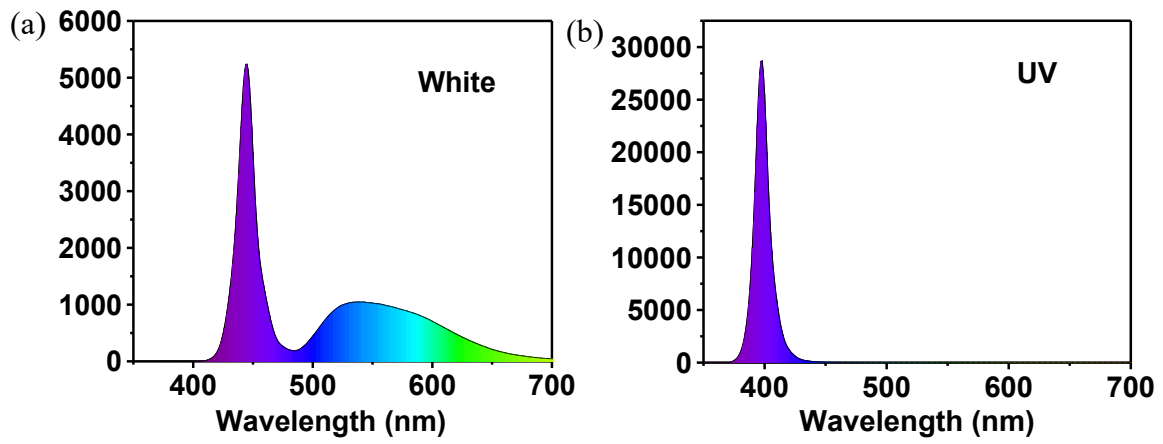

Fig. S5 The spectral profiles of UV and white light.
